# Supplementary material for: Critical Role of Monooxygenase in Biodegradation of 2,4,6-Trinitrotoluene by Buttiauxella sp. S19-1
Source: MDPI journal article supplement (doi:10.3390/molecules28041969), 2023-02-19
Supplement: s1 [file s1]

## Supplementary Materials

### Critical role of monooxygenase in biodegradation of 2,4,6-trinitrotoluene by *Buttiauxella* sp. S19-1

Miao Xu<sup>#</sup>, Lei He, Ping Su<sup>1#</sup>, Ming Wu, Xiyan Cui, Dong Liu, Amma G. Adomako-Bonsu, Min Geng, Guangming Xiong, Liquan Guo\* and Edmund Maser\*

Figures

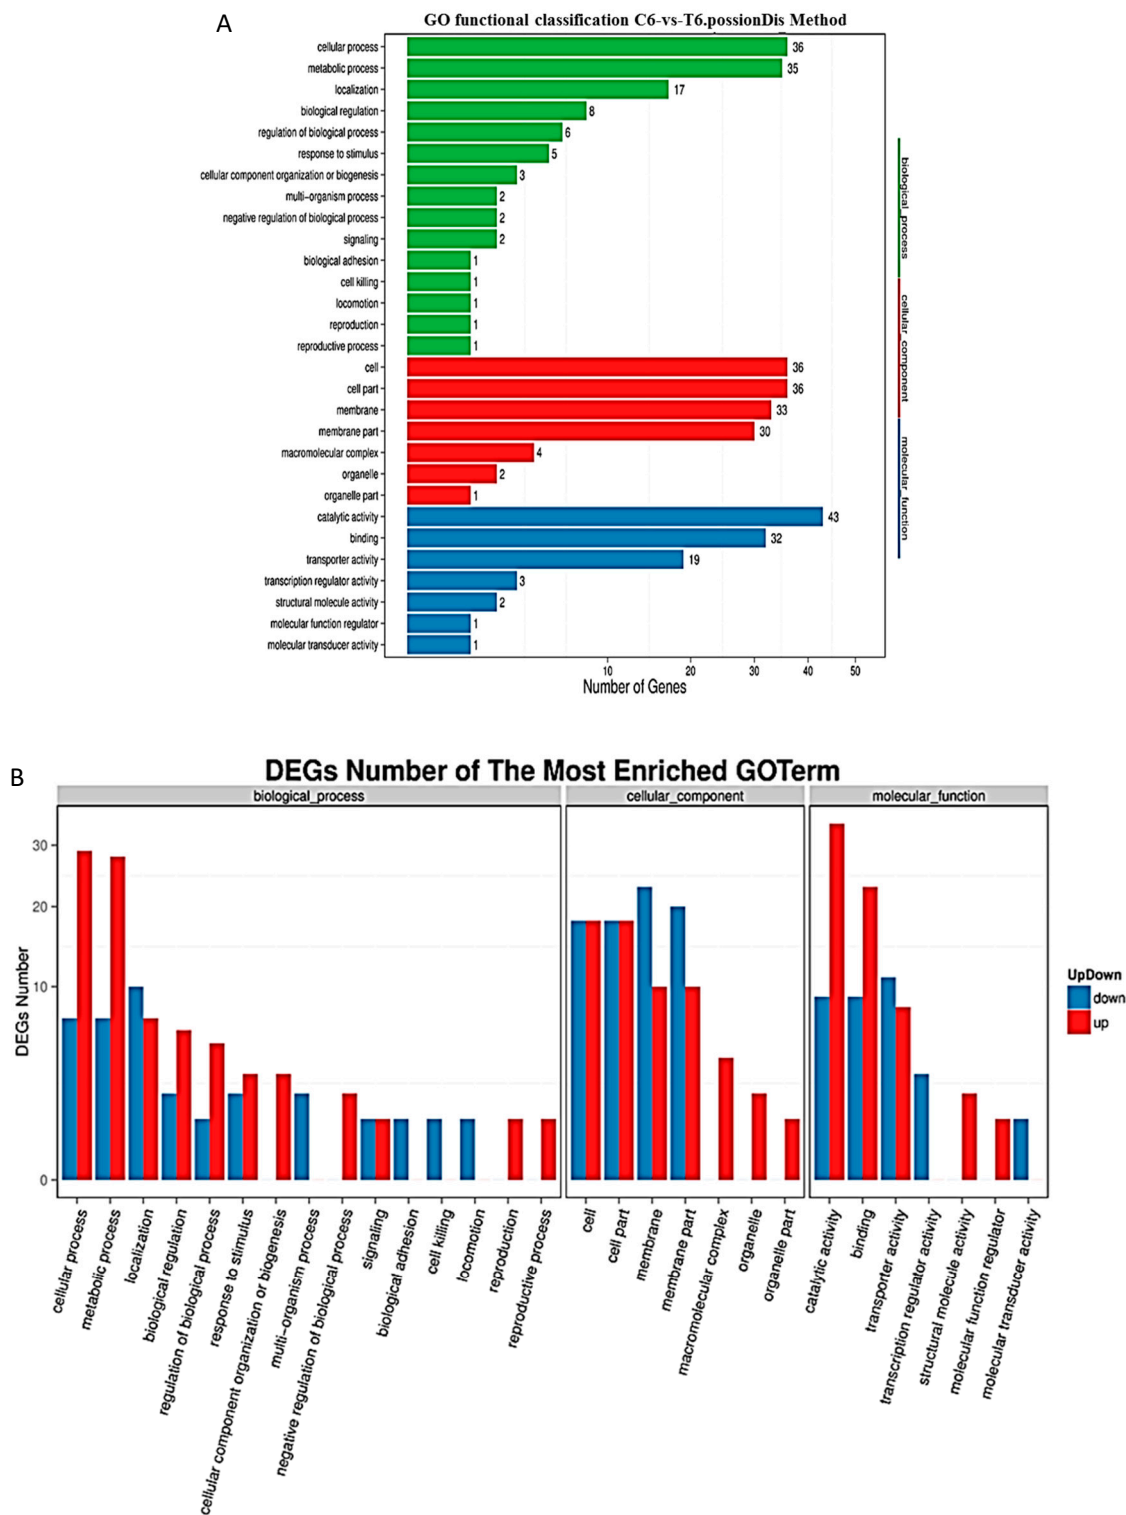

Figure S1. GO enrichment analysis in 6 h degradation groups.

A- Distribution of DEGs for GO enrichment analysis. B- GO enrichment analysis of DEGs

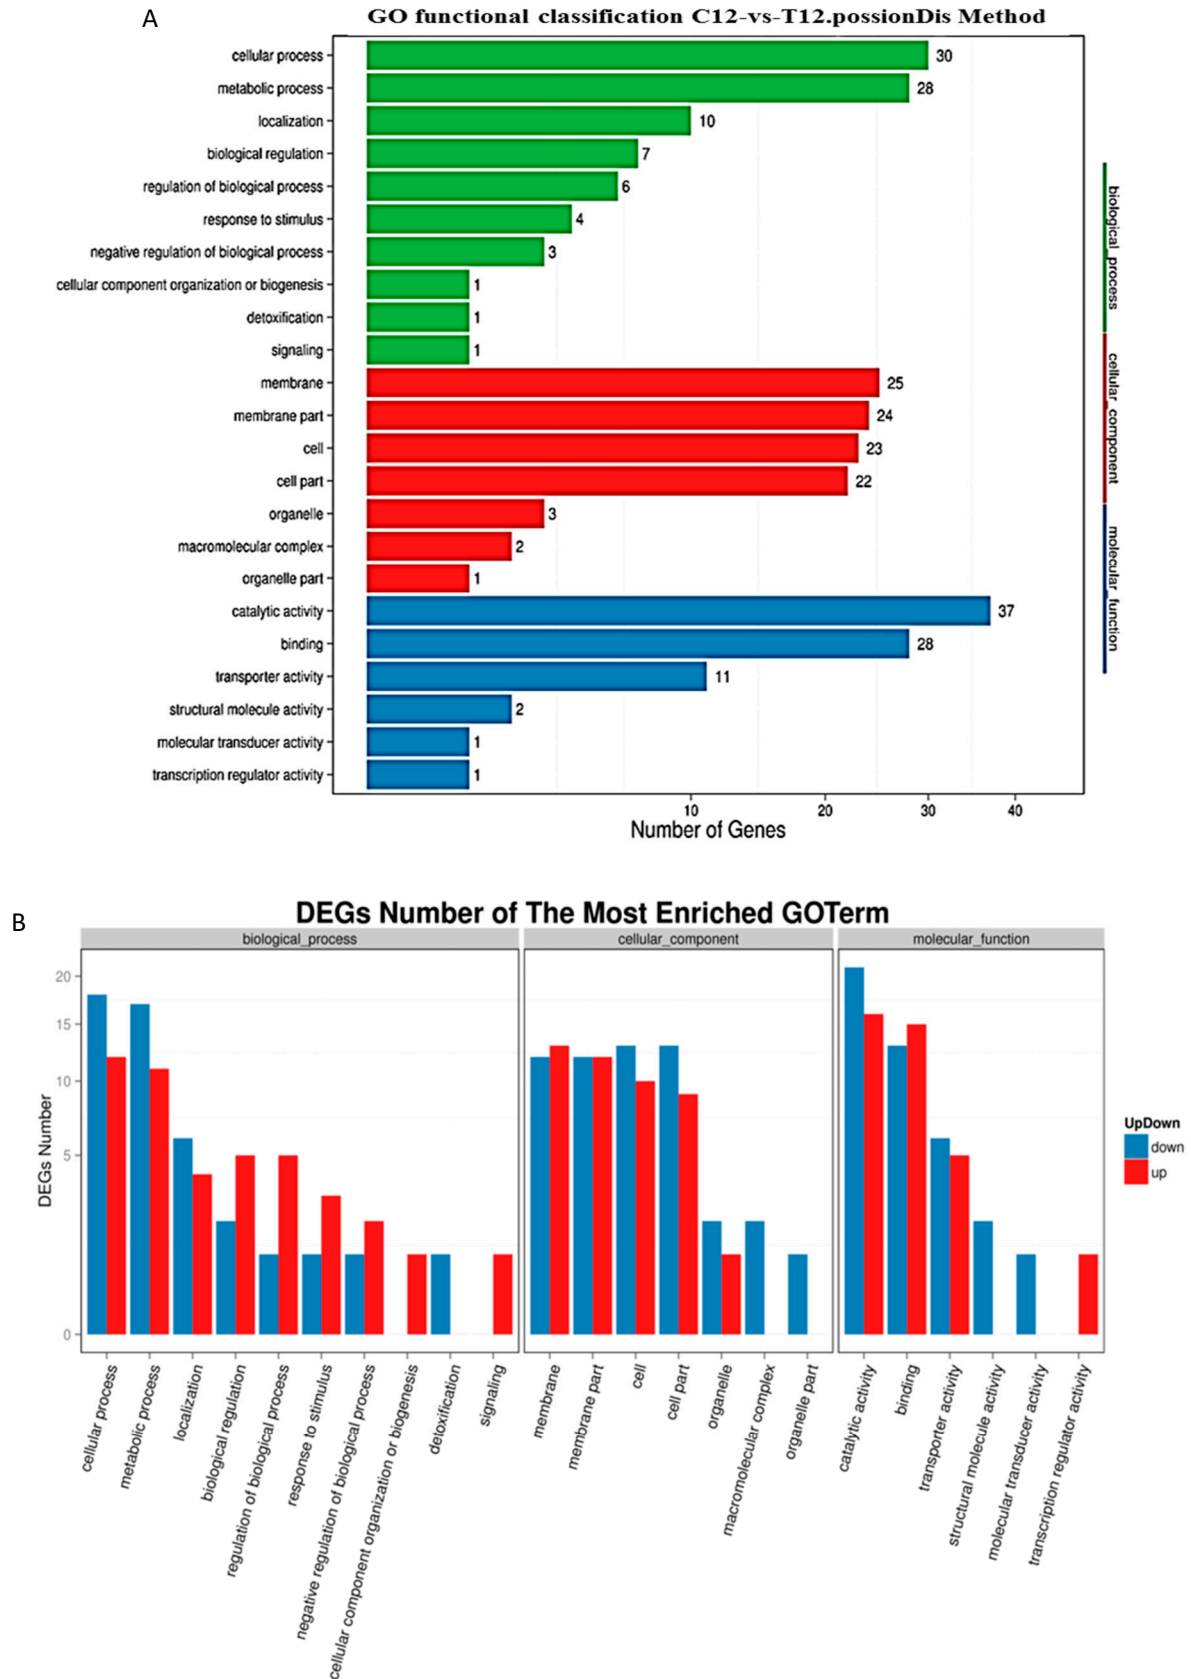

**Figure S2.** GO enrichment analysis in 12 h degradation groups.

**A-** Distribution of differential genes for GO enrichment analysis. **B-** GO enrichment analysis of DEGs.

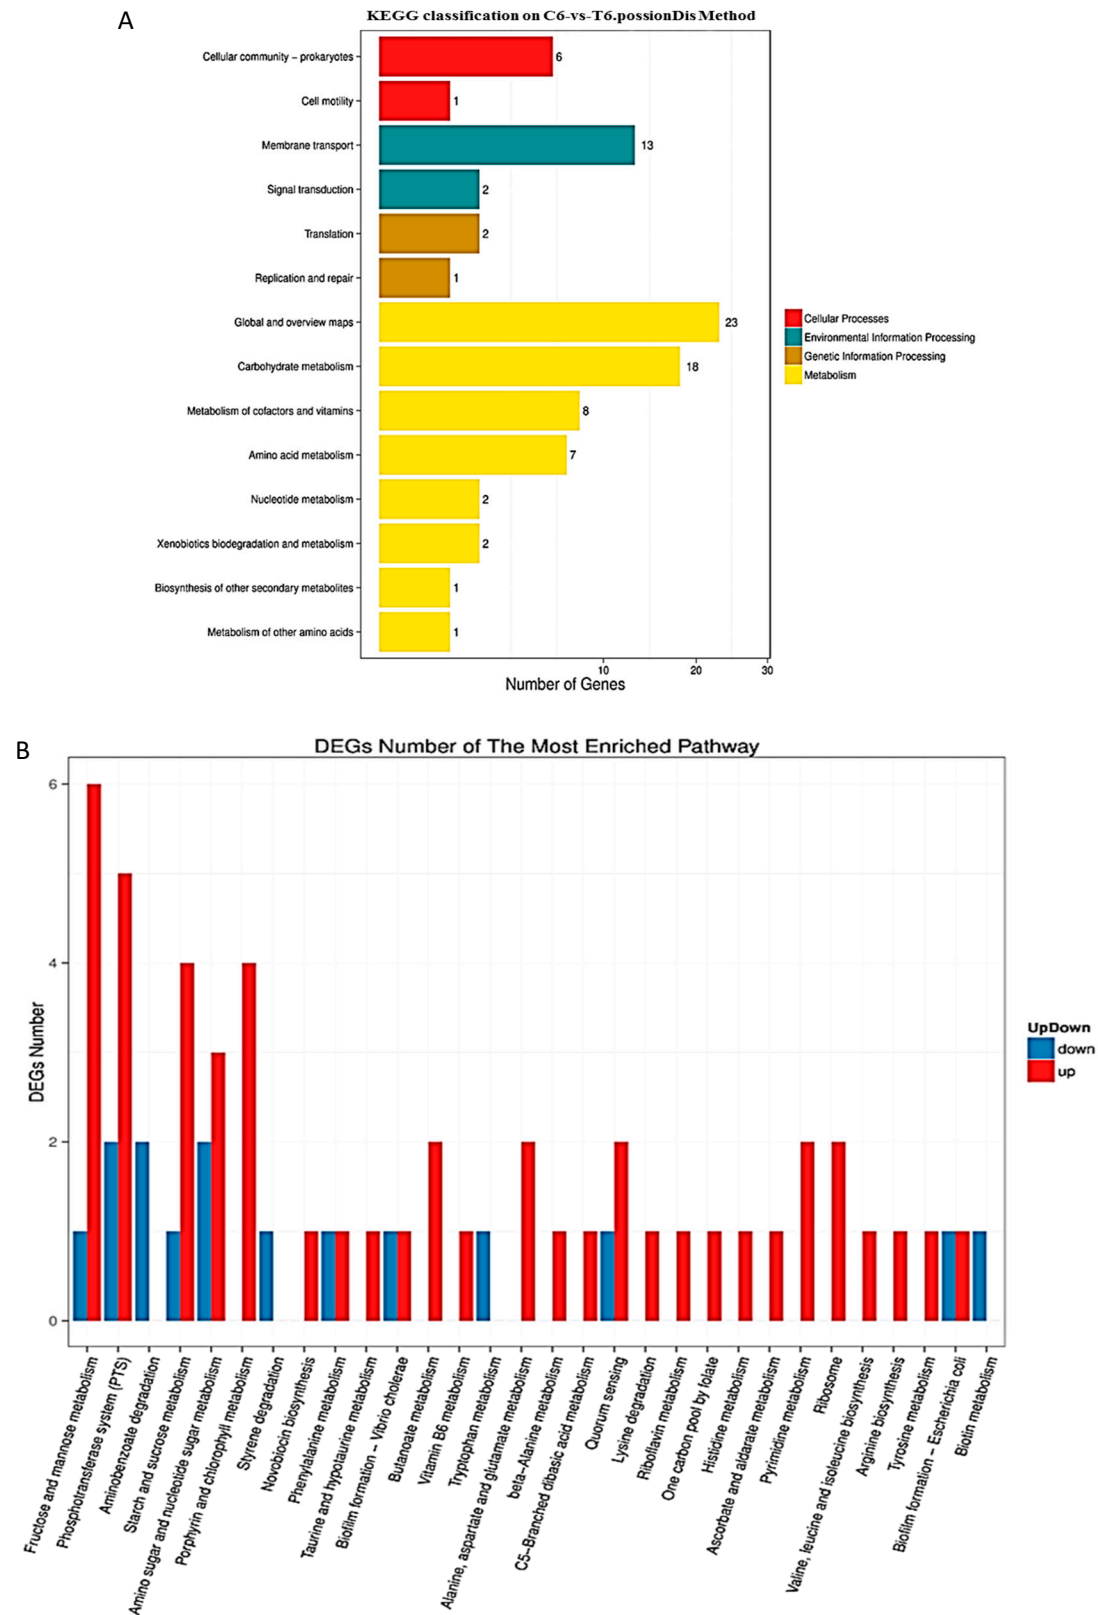

**Figure S3.** KEGG enrichment analysis of DEGs in 6 h degradation groups.

**A**-KEGG enrichment analysis of DEGs. **B**-Enrichment analysis of DEGs

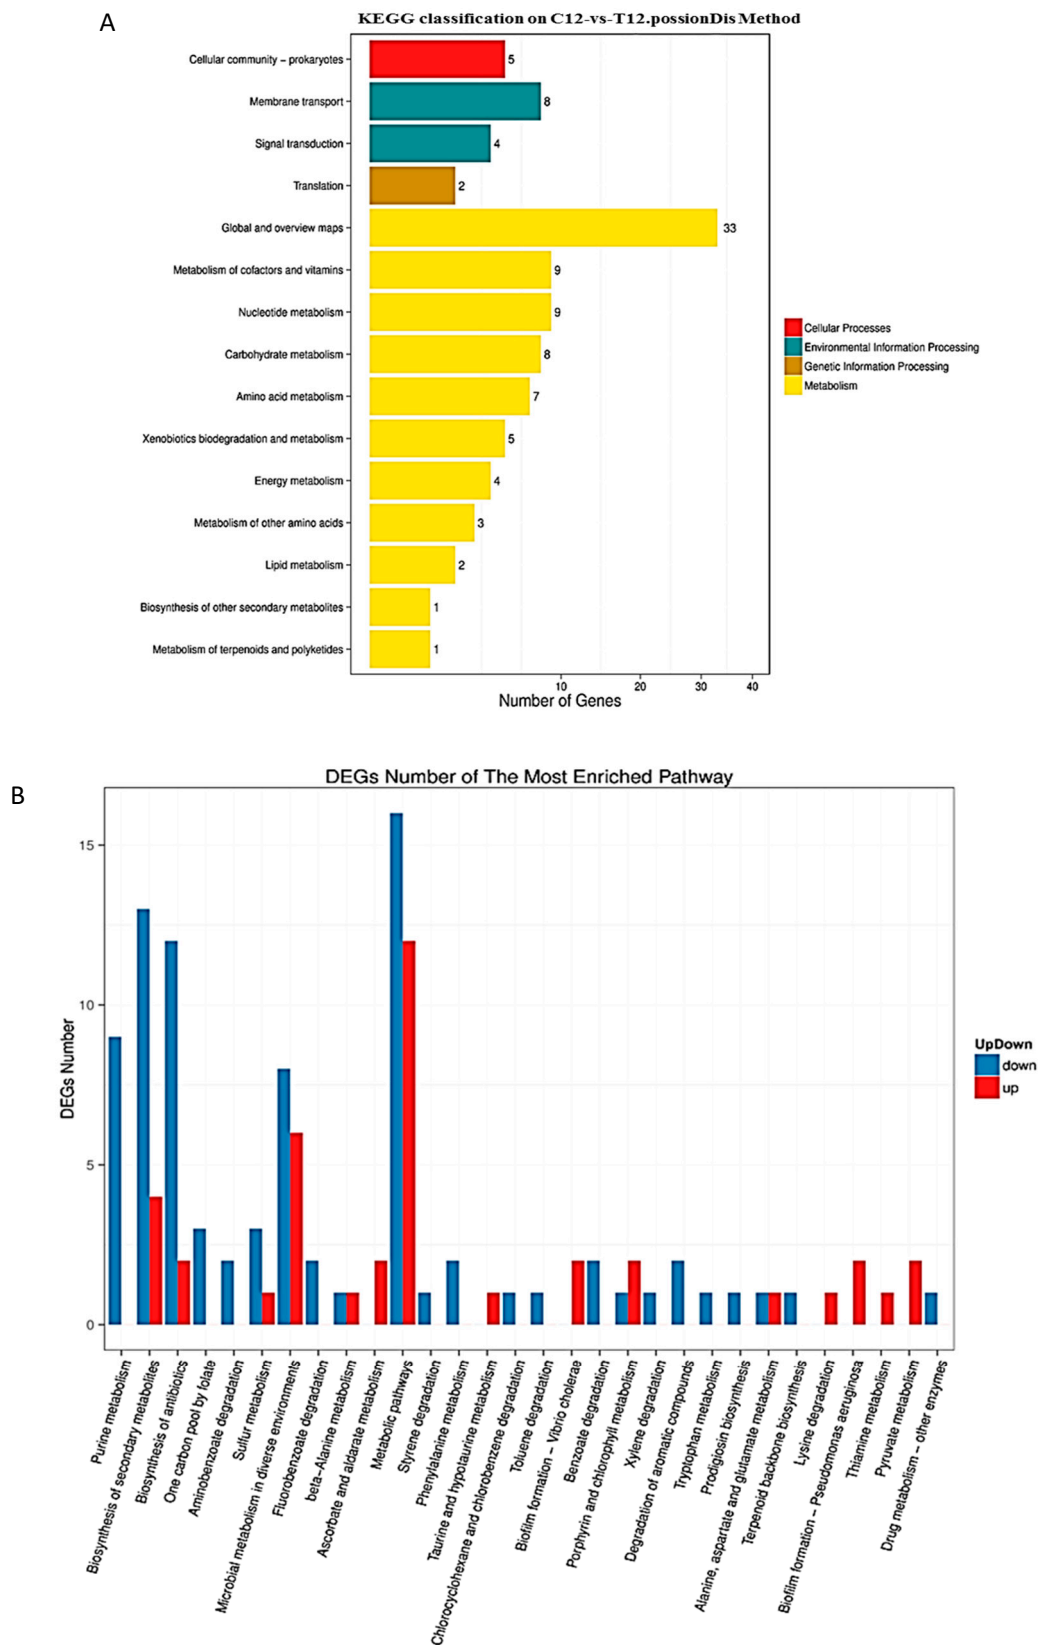

**Figure S4.** KEGG enrichment analysis of DEGs in 12 h degradation groups.

**A**-KEGG enrichment analysis of DEGs. **B**-Enrichment analysis of DEGs.

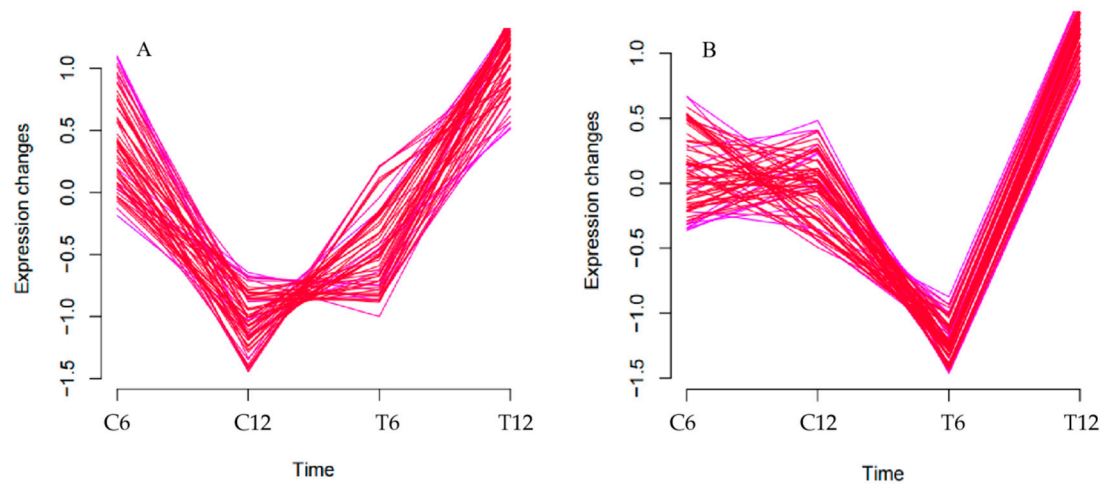

**Figure S5.** Spatiotemporal series analysis.

**A-**Expression changes at 6 h and 12 h. **B-**Expression changes between control groups (C) and TNT groups (T).

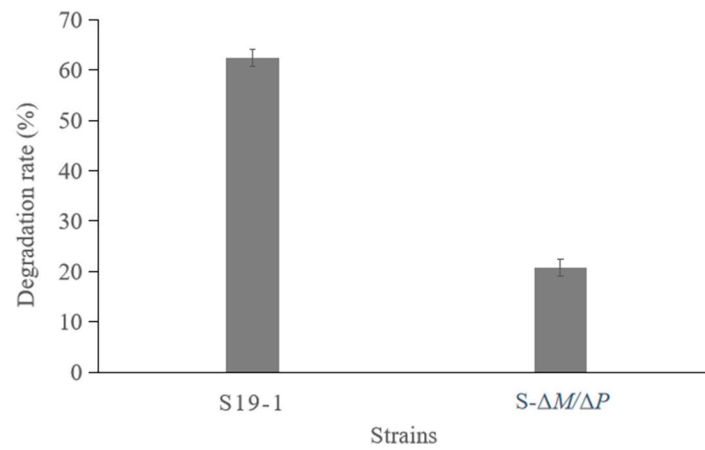

**Figure S6.** TNT degradation by wild type S19-1 and the S-ΔM/ΔP mutant for 6 h.

Data are presented as mean of N = 4,  $\bar{x} \pm SD$ . Statistical significance is denoted as  $p < 0.05$  using SPSS.

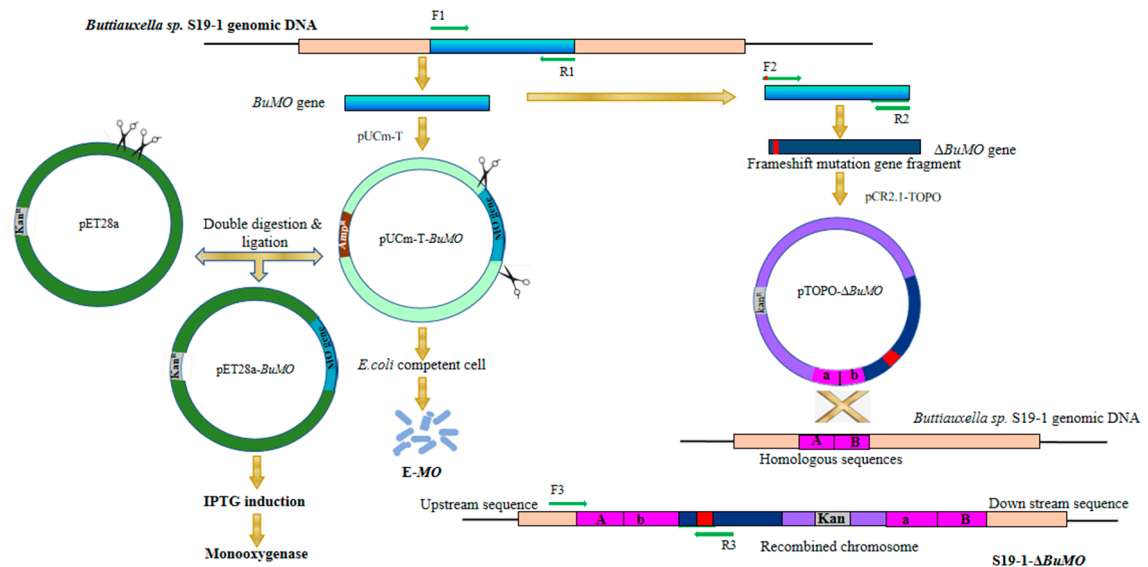

**Figure. S7** Schematic illustration of knockout and expression constructs.

Expression and knockout fragment are represented by blue and dark blue respectively; the inserted base is represented by red; genomic DNA and homologous sequences in strain S19-1 are represented by orange and pink; plasmid DNA is represented by light blue, green and purple respectively; resistance genes represented by brown and light gray.

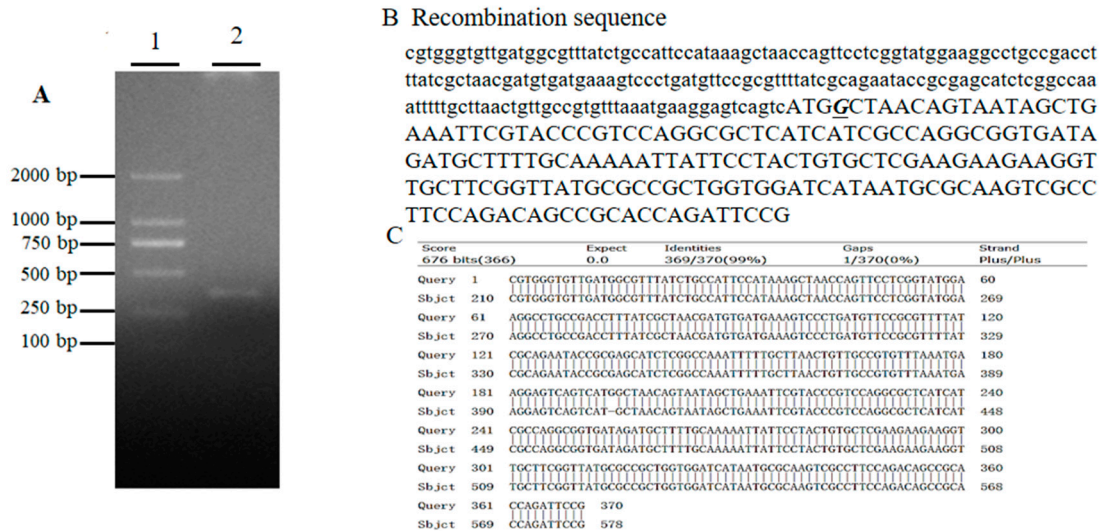

**Figure S8.** Identification of recombinant strain S-ΔMO.

**A**-gel showing size marker (1) and PCR product of recombination (2). **B**-sequence of recombination; genes labelled with lowercase letters are located on *Buttiauxella* sp. S19-1 genome before *BuMO* sequence. Genes labelled with capitalized letters are located on the plasmid. Insert bases are labelled, underlined and displayed in bold. **C**-homologous sequence alignment between sequences of recombination and *Buttiauxella* sp. S19-1 genome.

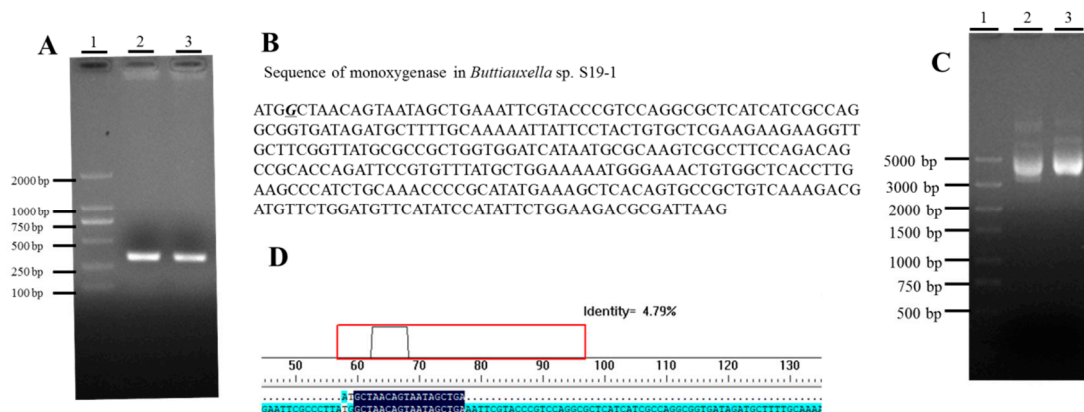

**Figure S9.** Cloning of the full sequence of *BuMO* and  $\Delta BuMO$  genes.

**A**-gel showing size marker (1), PCR of *BuMO* (315 bp, 2) and  $\Delta BuMO$  (316 bp, 3); **B**-Sequence of monooxygenase in *Buttiauxella* sp S19-1; **C**-gel showing size marker (1), pCR2.1-TOPO (3931 bp, 2) and pTOPO- $\Delta BuMO$  (pT-MO 4250 bp, 3); **D**-blast of sequences between *BuMO* and pT- $\Delta MO$ .

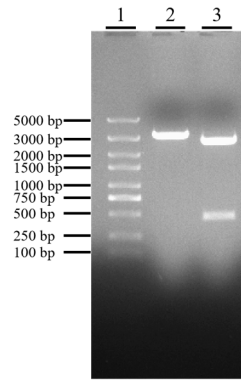

**Figure S10.** Agarose gel of restriction-digested pUCm-T-*BuMO*.

Gel showing single/double digested product of pUCm-T-*BuMO* by *EcoR* I and *Hind* III (double digested sites are located on both sides of the multiple cloning site of pUCm-T) respectively. The size marker is labelled appropriately (1); the size of the product of pUCm-T-*BuMO* (2) is approximately 3088 bp and the double digested product of pUCm-T-*BuMO* (3) is approximately 2635 bp and 453 bp.

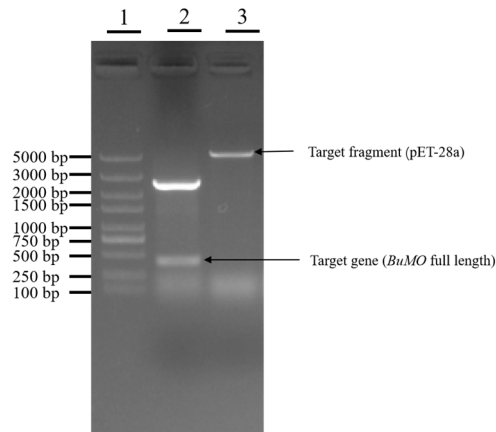

**Figure S11.** Construction of *BuMO* expressing-vector with pET28a and pUCm-T-*BuMO*.



## Tables

**Table S1.** Statistics of filtered reads quality.

| Samples | Total<br>Raw<br>Reads<br>(Mb) | Total<br>Clean<br>Reads<br>(Mb) | Total<br>Clean<br>bases<br>(Gb) | Clean<br>Reads<br>Q20<br>(%) | Clean<br>Reads<br>Q30<br>(%) | N<br>Reads<br>(%) | Low<br>Quality<br>Reads<br>(%) | Adapte<br>r Reads<br>(%) | Other<br>Reads<br>(%) | GC<br>content<br>(%) | Clean<br>Read<br>Ratio<br>(%) |
|---------|-------------------------------|---------------------------------|---------------------------------|------------------------------|------------------------------|-------------------|--------------------------------|--------------------------|-----------------------|----------------------|-------------------------------|
| C12     | 16.33                         | 15.02                           | 2.25                            | 99.15                        | 97.34                        | 0.01              | 2.14                           | 5.83                     | 0.00                  | 51.88                | 92.01                         |
| C6      | 16.33                         | 15.31                           | 2.30                            | 98.98                        | 96.88                        | 0.01              | 3.05                           | 3.17                     | 0.00                  | 52.94                | 93.78                         |
| T12     | 16.33                         | 15.12                           | 2.27                            | 99.09                        | 97.19                        | 0.01              | 2.12                           | 5.27                     | 0.00                  | 52.20                | 92.60                         |
| T6      | 16.33                         | 14.94                           | 2.24                            | 99.11                        | 97.22                        | 0.01              | 2.35                           | 6.15                     | 0.00                  | 52.66                | 91.49                         |

Q20: The quality value is greater than 20, indicating that the base error rate is 1%.

Q30: The quality value is greater than 30, indicating that the base error rate is 0.1%.

Ps: Strain S19-1 was cultured in TNT-containing medium for 6 h (T6) and 12 h (T12). The control samples were obtained from strain S19-1 cultures incubated for 6 h (C6) and 12 h (C12) in the absence of TNT.

**Table S2.** Up-regulation of differentially expressed genes top10 in TNT degradation group (6h/12h).

| Gene ID       | Sets | Length | Log2 FC     | Significance | GO         | KEGG   |
|---------------|------|--------|-------------|--------------|------------|--------|
| mar           | 6h   | 210    | 8.501173724 | P<0.01       | -          | K13630 |
| hycH          | 6h   | 411    | 7.348728154 | P<0.01       | GO:0008047 | K15834 |
| sgrT          | 6h   | 177    | 6.661956343 | P<0.01       | GO:0046325 | -      |
| D8682_RS02970 | 6h   | 228    | 3.414039716 | P<0.01       | -          | -      |
| D8682_RS04610 | 6h   | 240    | 3.278254252 | P<0.01       | -          | -      |
| D8682_RS04560 | 6h   | 243    | 3.131582799 | P<0.01       | -          | -      |
| D8682_RS10315 | 6h   | 366    | 2.944756058 | P<0.01       | GO:0003677 | K02237 |
| D8682_RS19250 | 6h   | 1179   | 2.928001676 | P<0.01       | GO:0015542 | K03291 |
| D8682_RS22070 | 6h   | 1242   | 2.896608819 | P<0.01       | GO:0015542 | -      |
| D8682_RS24265 | 6h   | 282    | 2.696634137 | P<0.01       | GO:0015087 | K02009 |
| D8682_RS26110 | 12h  | 183    | 10.7968508  | P<0.01       | -          | -      |
| D8682_RS20940 | 12h  | 291    | 9.121533517 | P<0.01       | GO:0003677 | K07724 |
| D8682_RS06365 | 12h  | 495    | 7.988684687 | P<0.01       | -          | K11903 |
| D8682_RS19245 | 12h  | 177    | 5.697772294 | P<0.01       | GO:0046325 | -      |
| D8682_RS01190 | 12h  | 999    | 5.087462841 | P<0.01       | GO:0016021 | K14347 |
| D8682_RS26465 | 12h  | 999    | 5.087462841 | P<0.01       | GO:0016021 | K14347 |
| D8682_RS11885 | 12h  | 399    | 3.662965013 | P<0.01       | -          | -      |
| D8682_RS02235 | 12h  | 603    | 3.074109214 | P<0.01       | -          | -      |
| D8682_RS16090 | 12h  | 696    | 2.870716983 | P<0.01       | GO:0016021 | K10921 |
| D8682_RS11975 | 12h  | 318    | 2.525478068 | P<0.01       | GO:0004497 | K04025 |

**Table S3.** Analysis of monooxygenase in TNT degradation groups.

| geneID | gene | CK1  | TNT  | log2F | Up-Do    | FDR   | P-value | type   | GO            | Blast nr  |
|--------|------|------|------|-------|----------|-------|---------|--------|---------------|-----------|
| D      | eLe  | 2-FP | 12-F | oldC  | wn-Re    |       | e       |        | Function      |           |
|        | ngt  | KM   | PK   | hang  | gulation |       |         |        |               |           |
|        | h    |      | M    | e     | n        |       |         |        |               |           |
|        |      |      |      | (TNT  | (TNT12   |       |         |        |               |           |
|        |      |      |      | 12/C  | /CK12)   |       |         |        |               |           |
|        |      |      |      | K12)  |          |       |         |        |               |           |
| D8682  | 318  | 150. | 308. | 2.525 | Up       | 5.28E | 3.23E-  | known_ | GO:0004497/   | WP_0645   |
| _RS11  |      | 64   | 64   | 48    |          | -15   | 16      | mRNA   | /monooxyge    | 40086.1/9 |
| 975    |      |      |      |       |          |       |         |        | nase activity | .1e-53/1  |

**Table S4.** Primers used in this study.

| Primer name | Sequence                   |
|-------------|----------------------------|
| pFM1        | 5' ATGCTAACAGTAATA-3'      |
| pRM1        | 5'-CTTAATCGCGTCTTC-3'      |
| PFM2        | 5'-ATGGCTAACAGTAATA-3'     |
| pRM2        | 5'-CTTAATCGCGTCTTC-3'      |
| PFM3        | 5'-CGTGGGTGTTGATGGCGTTT-3' |
| pRM3        | 5'-CGGAATCTGGTGCGGCTGT-3'  |
